# Supplementary material for: Hydrocinnamic acid produced by Enterobacter xiangfangensis impairs AHL-based quorum sensing and biofilm formation in Pseudomonas aeruginosa
Source: PubMed Central journal article supplement — RSC Adv. 2019 Sep 11;9(49):28678–87. doi: 10.1039/c9ra05725k (PMC9071187; doi:10.1039/c9ra05725k), 2019-09-11
Supplement: RA-009-C9RA05725K-s001.pdf [file RA-009-C9RA05725K-s001.pdf]

1 **Supplementary**

2

3 **Figure S1**

4

5

6

7

8

9

10

11

12

13

14

15

16

17

18

19

20

21

22

23

24

25

26

27

28

29

30

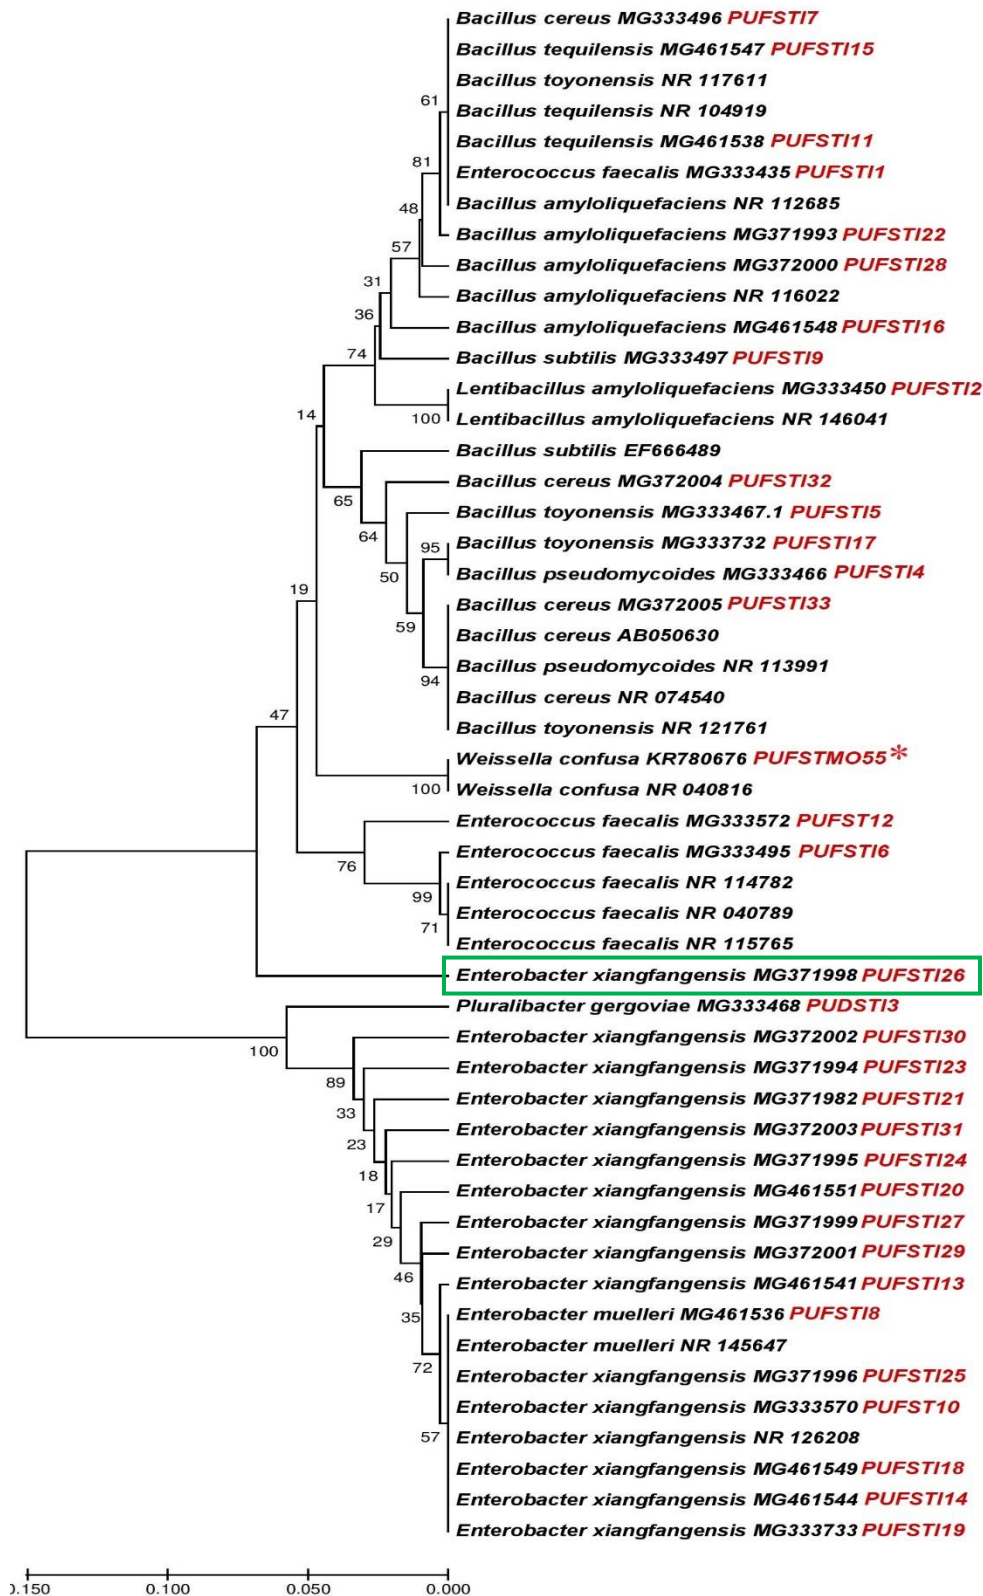

31 Figure S2

32

33

34 HYDROCINNAMIC ACID-(18ES-0721) 1971 (12.657)

Scan EI+  
2.79e9

35

36

37

38

39

40

41

42

43

44

45

46

47

48

49

50

51

52

53

54

55

56

57

58

59

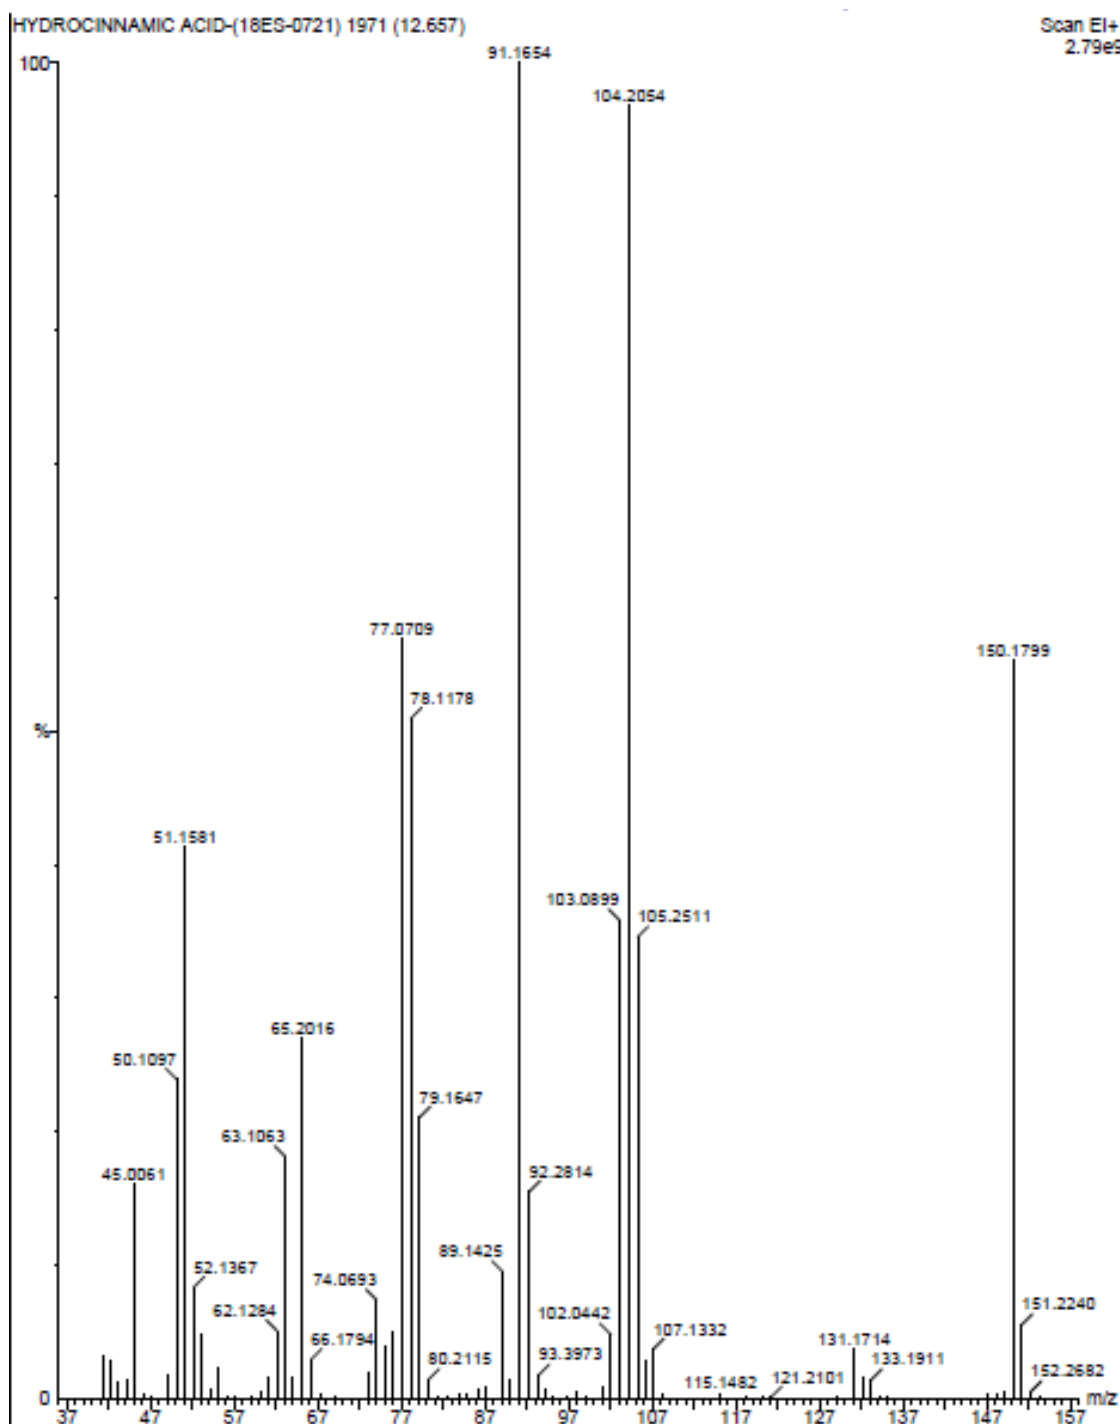

60 **Fig. S1 Identification of AHL-degrading bacteria.** UPGMA phylogenetic derived based on 16S  
61 rDNA sequence against reference isolates with closest BLAST hits from NCBI database.

62 **Fig. S2 GC-MS analysis of QS-inhibitory fraction.** GC chromatogram and MS/MS analysis of  
63 the active fraction purified from *E. xiangfangensis* cell free extract. Peaks are a function of  
64 intensity measured in milli-absorption units over time in minutes.

65
